# Supplementary material
Source: publisher figshare collection journal article supplement (https://acs.figshare.com/ndownloader/files/4533988)
Supplement: Supplementary file 1 [file 4533988]

## Supporting Information

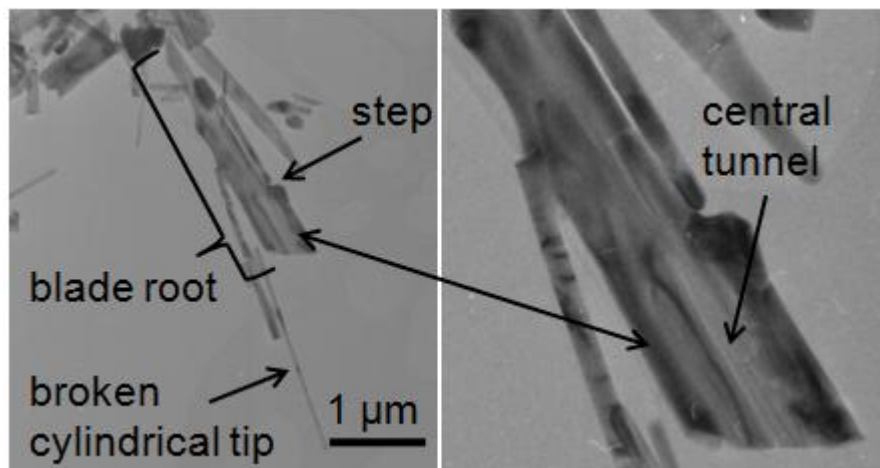

**Figure S1** TEM image of a blade-like bicrystal nanoflake base and a cylindrical single crystal nanoflake tip that likely broke from the parent blade-like nanoflake during sample preparation. The blade-like nanoflakes taper gradually and also in abrupt steps. At the base of the nanoflake shown, a central tunnel, much like those imaged by Voss *et al.*,<sup>26</sup> is observed.

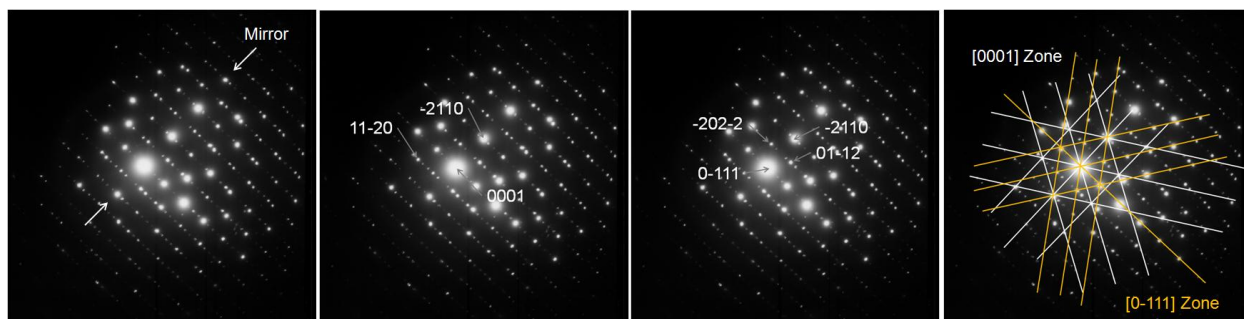

**Figure S2** SAD pattern from the base of a single  $\alpha$ - $\text{Fe}_2\text{O}_3$  nanoflake grown at 800 °C in the post-flame region. The pattern shows an apparent mirror plane and, when indexed, resolves into two complete, coincident zones, the [0001] and the [0111], with a common (2110) reflection. This is the same nonstructural twin identified by Voss *et al.*,<sup>26</sup> with twin plane (0111) and shear direction [0112]. The axial growth direction in these twinned “bicrystal” nanoflakes was found to be  $\langle 1120 \rangle$  type, or  $\langle 110 \rangle_{\text{hex}}$ . These twinned nanoflakes have a broad side formed by the  $\{1101\}$  or  $\{111\}_{\text{hex}}$  type planes, as a consequence of the twin plane.

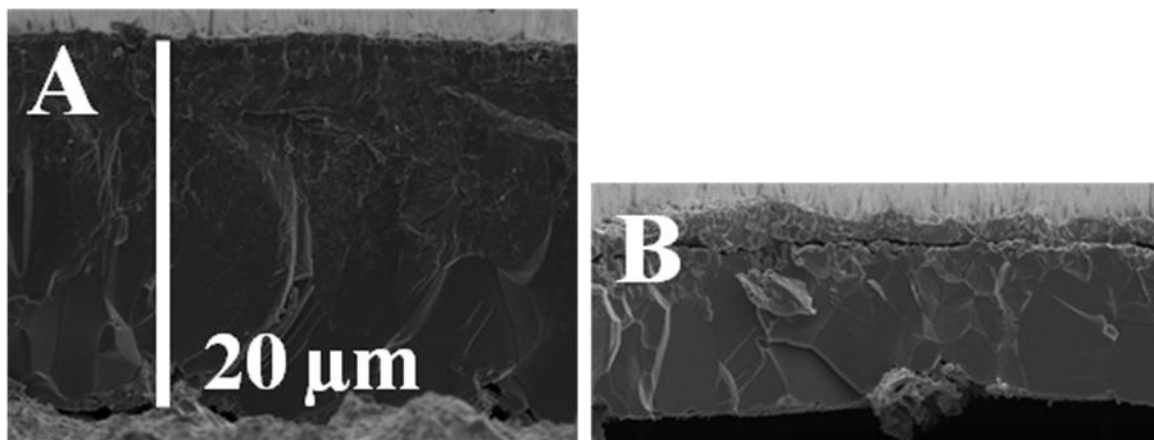

**Figure S3**  $\alpha$ -Fe<sub>2</sub>O<sub>3</sub> nanoflakes were grown in a tube furnace for 20 minutes at 700 °C with 5 SLPM air flow and (A) a small heating rate of approximately 100 °C/min and (B) a large heating rate of 1400 °C/min. The resulting total oxide layers are shown here, with both images to the same scale.

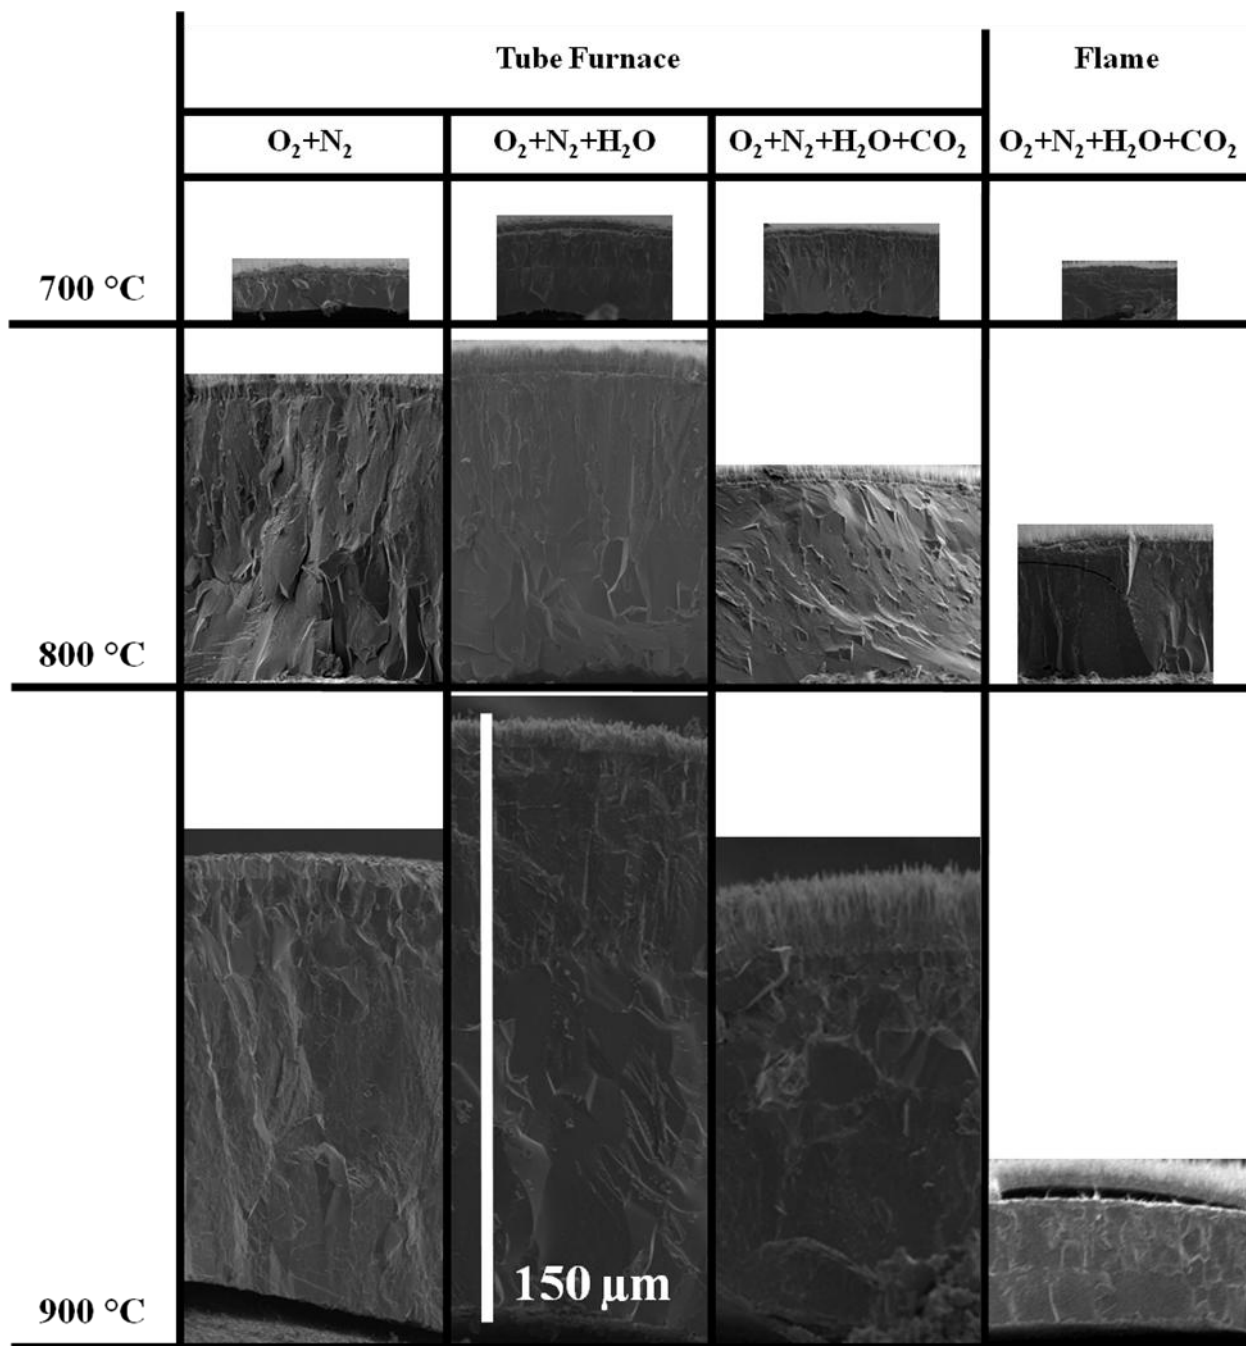

**Figure S4**  $\alpha$ - $Fe_2O_3$  nanoflakes were grown in a tube furnace for 20 minutes at 700, 800 and 900 °C with gas phase compositions including air ( $O_2 + N_2$ ), air and water vapor ( $O_2 + N_2 + H_2O$ ) and air, water vapor and carbon dioxide ( $O_2 + N_2 + H_2O + CO_2$ ). The resulting total oxide layers are shown here, with all images to the same scale.
